# Supplementary material
Source: Royal Society of Chemistry journal article supplement (doi:10.1039/d6ay00576d)
Supplement: d6ay00576d1.pdf [file d6ay00576d1.pdf]

## Supplementary material

**Table 1.** Oligonucleotide sequences used in this work.

| Title        | Sequences (5' to 3')                                                                                                                                                                              |
|--------------|---------------------------------------------------------------------------------------------------------------------------------------------------------------------------------------------------|
| Target miRNA | UGA GGU AGU AAG UUG UAU UGU                                                                                                                                                                       |
| Let-7a       | UGA GGU AGU AGG UUG UAU AGU U                                                                                                                                                                     |
| miRNA-141    | UAA CAC UGU CUG GUA AAG AUG G                                                                                                                                                                     |
| S1           | CCC TAA CCC TAA CCC TAA CCC T GCT GAG G TGG<br>TAA CGG AGG TGG TTT CAA GTC GTC CAG TTG AAA                                                                                                        |
| S2           | TTT CAA CTG GAC GAC TTG AAA AAC AAT ACA ACT<br>TAC TAC CTC A GCT GAG G TTT CAA CTG GAC GAC<br>TTG AAA TTT CCT CTG GAC GAC TTG AAA AAC AAT<br>ACA ACT TAC TAC CTC A TTT CAA GTC GTC CAG TTG<br>AAA |
| S3           | CCA CCT CCG TTA CCA AAC AAT ACA ACT TAC TAC<br>CTC A GCT GAG G TTT CAA GTC GTC CAG TTG AAA                                                                                                        |

**Table S2.** A brief comparison of the method with former ones.

| Title                   | Mechanism                         | LOD     | Duration | Detection mode                     | One-pot | Ref |
|-------------------------|-----------------------------------|---------|----------|------------------------------------|---------|-----|
| The method              | Self-priming cyclic amplification | 0.82 fM | 100 min  | <i>In vitro</i>                    | Yes     |     |
| RACE                    | RCA                               | 90 fM   | 150 min  | <i>In vitro</i>                    | No      | 1   |
| vcPeLa                  | PER+ LAMP                         | 0.31 fM | 120 min  | <i>In vitro</i>                    | Yes     | 2   |
| FISH-Cas12a             | Cas12a                            | 0.42 pM | 150 min  | <i>In vitro</i>                    | No      | 3   |
| Y-shaped probe mediated | EXPAR                             | 0.58 nM | 60 min   | <i>In vitro</i> and <i>in vivo</i> | No      | 4   |

**Notes:** EXPAR, exponential amplification reaction; PER, primer exchange reaction; RCA, rolling circle amplification; LOD, limit of detection

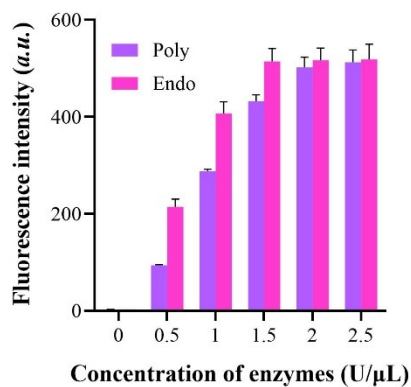

**Figure S1.** Fluorescence intensity of the method when detecting 1pM target miRNA with different enzyme concentration.

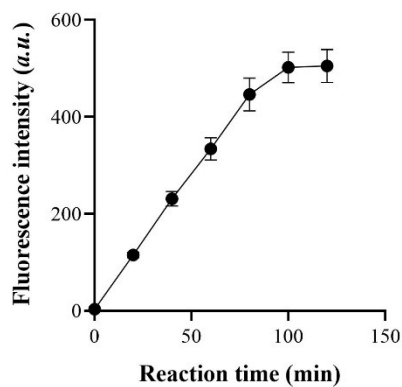

**Figure S2.** Fluorescence intensity of the method when detecting 1pM target miRNA with reaction time.

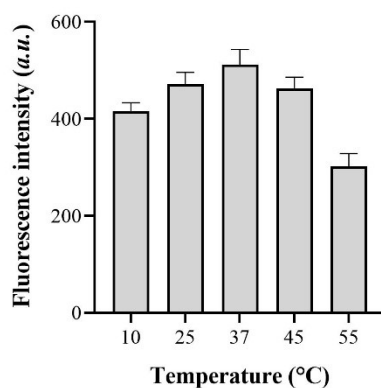

**Figure S3.** Fluorescence intensity of the method when detecting 1pM target miRNA with different temperature.

### Supplemented experimental section

#### *qRT-PCR protocol*

Total RNA was extracted from serum samples using TRIzol LS Reagent (Thermo

Fisher Scientific) according to the manufacturer's instructions. Reverse transcription was performed with a stem-loop RT primer specific to the target miRNA using a TaqMan MicroRNA Reverse Transcription Kit (Applied Biosystems). The resulting cDNA was then amplified in a QuantStudio 5 Real-Time PCR System using TaqMan Universal PCR Master Mix and a specific TaqMan MicroRNA Assay. The thermal cycling conditions were: 95 °C for 10 min, followed by 40 cycles of 95 °C for 15 s and 60 °C for 60 s. Each sample was run in triplicate, and relative expression levels were calculated using the  $2^{-\Delta\Delta C_t}$  method with appropriate endogenous controls.

#### *Ethical statement*

This study was conducted in accordance with the Declaration of Helsinki and approved by the Institutional Review Board (IRB) of The Third People's Hospital of Cangnan County (IRB No. TPHCC-2024-032). Written informed consent was obtained from the parents or legal guardians of all participating children.

#### **References:**

1. Wang, R.; Zhao, X.; Chen, X.; Qiu, X.; Qing, G.; Zhang, H.; Zhang, L.; Hu, X.; He, Z.; Zhong, D.; Wang, Y.; Luo, Y., Rolling Circular Amplification (RCA)-Assisted CRISPR/Cas9 Cleavage (RACE) for Highly Specific Detection of Multiple Extracellular Vesicle MicroRNAs. *Anal. Chem.* **2020**, *92* (2), 2176-2185.
2. Liu, X.; Peng, H.; Ye, X.; Zhang, X.; Xu, G.; Zhao, X., A Versatile Colorimetric Diagnostic Platform Based on Primer Exchange Reaction Cascades Driven Loop-Mediated Isothermal Amplification. *Anal. Chem.* **2025**, *97* (16), 9000–9007.
3. Liu, J.; Li, X.; Zhou, D.; Yang, H.; Liu, M.; Su, K.; Yan, Y., Fluid interface-constrained split crRNA-Cas12a for rapid and high sensitive miRNA detection. *Microchem. J.* **2025**, *219*.
4. Du, Y.; Sun, R.; Hao, S.; Yang, F.; Hu, Q.; Xue, R., Y-shaped nanoprobe-based DNA microarray for rapid detection of multiplex miRNAs with single-nucleotide specificity. *Microchem. J.* **2026**, *222*.
